# Supplementary material for: Facile synthesis of monodisperse chromogenic amylose–iodine nanoparticles as an efficient broad-spectrum antibacterial agent
Source: Royal Society of Chemistry journal article supplement (doi:10.1039/d0tb00161a), 2020-01-01
Supplement: d0tb00161a1.pdf [file d0tb00161a1.pdf]

## Electronic Supplementary Information

### Facile Synthesis of Monodisperse Chromogenic Amylose-Iodine Nanoparticles as an Efficient Broad-Spectrum Antibacterial Agent

Yanbin Sun<sup>a#</sup>, Xianwen Wang<sup>a#</sup>, Linxin Fan<sup>a</sup>, Xianli Xie<sup>b</sup>, Zhaohua Miao<sup>a</sup>, Yan Ma<sup>a</sup>, Tao He<sup>b\*</sup> and Zhengbao Zha<sup>a\*</sup>

<sup>a</sup> School of Food and Biological Engineering, Hefei University of Technology, Hefei, Anhui 230009, P. R. China.

<sup>b</sup> School of Chemistry and Chemical Engineering, Hefei University of Technology, Hefei, Anhui 230009, P. R. China.

\* Corresponding author. Email: [zbzha@hfut.edu.cn](mailto:zbzha@hfut.edu.cn); [taohe@hfut.edu.cn](mailto:taohe@hfut.edu.cn); Tel: +86 551 62901285.

#### Calculation of the photothermal conversion efficiency

To calculate the photothermal conversion efficiency of AM-I NPs, 1 mL of AM-I NPs aqueous solution (90 µg/mL) was continuously irradiated under the same condition until reaching a steady-state temperature. The laser was then shut off and the temperature decrease process was also recorded. the photothermal conversion efficiency ( $\eta$ ) was calculated using equation (1) described by Roper<sup>1</sup>:

$$\eta = \frac{hS(T_{max} - T_{surr}) - Q_s}{I(1 - 10^{-A_{808}})} \quad (1)$$

where  $h$  is the heat transfer coefficient,  $S$  is the surface area of the container,  $T_{max}$  is the maximum system temperature,  $T_{surr}$  is the ambient surrounding temperature,  $Q_s$  is the heat associated with the light absorbance of the solvent,  $I$  is the laser power (2 w) and  $A_{808}$  is the absorbance of AM-I NPs at 808 nm. The value of  $hS$  is derived according to equation (2):

$$\tau_s = \frac{m_D C_D}{hs} \quad (2)$$

where  $\tau_s$  is the sample system time constant,  $m_D$  and  $C_D$  are the mass (1 g) and heat capacity (4.2 J/ (g.°C)) of deionized water, respectively.  $Q_s$  is measured

independently to be 12.6 mW using pure water. In order to get the value of  $hS$ , we further introduce  $\vartheta$ , which is defined as follows:

$$\theta = \frac{T - T_{\text{surr}}}{T_{\text{max}} - T_{\text{surr}}} \quad (3)$$

where  $T$  is the solution temperature. Thus,  $hS$  can be determined by applying the linear time data from the cooling period *vs*  $-\ln\vartheta$ .

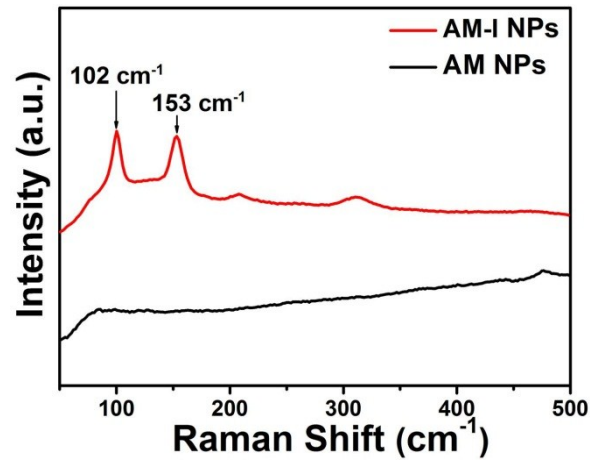

**Fig. S1** Raman spectra of AM NPs and AM-I NPs.

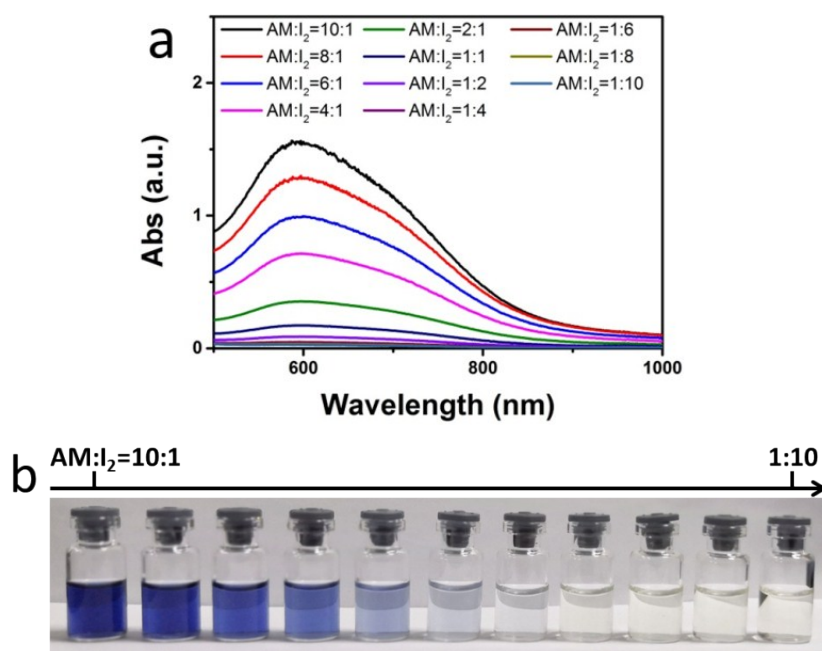

**Fig. S2** a) The UV-vis-NIR absorption spectrum and b) digital photograph of different mass ratio between AM NPs and  $\text{KI-I}_2$ .

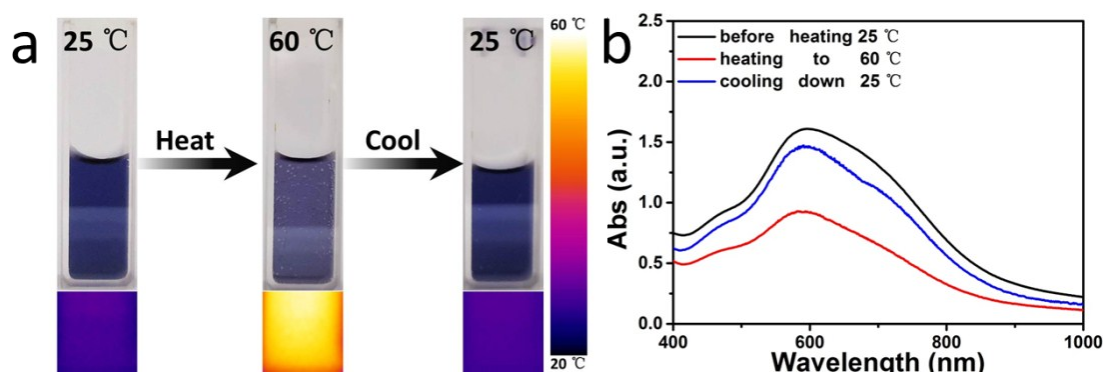

**Fig. S3** The change of AM-I NPs before heating, holding temperature and cooling down. a) Digital photograph and thermal image; b) UV-vis-NIR spectra.

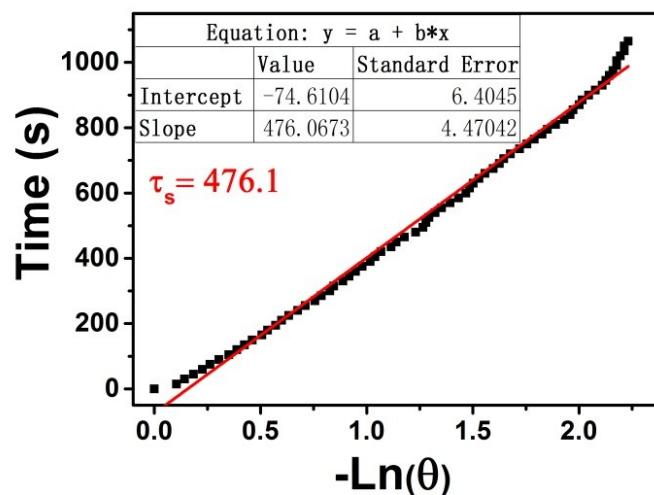

**Fig. S4** Calculation of the photothermal conversion efficiency according the data of time and negative natural logarithm of the temperature.

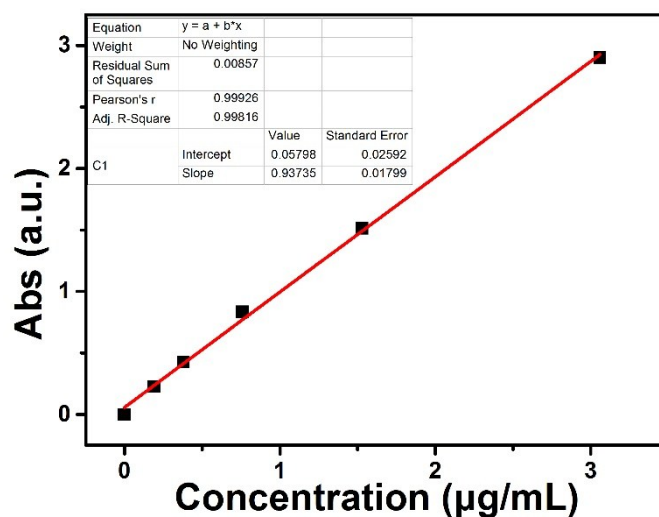

**Fig. S5** The standard curve of KI-I<sub>2</sub> solution ( $\lambda=225$  nm).

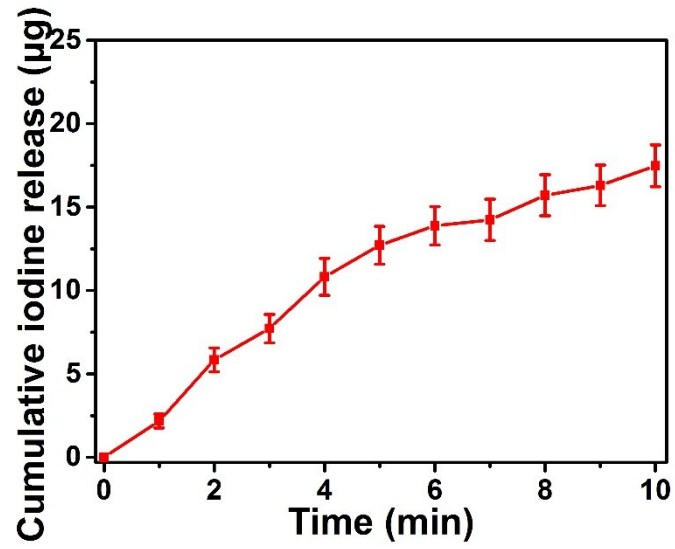

Fig. S6 The cumulative release amount of iodine from AM-I NPs at different times.

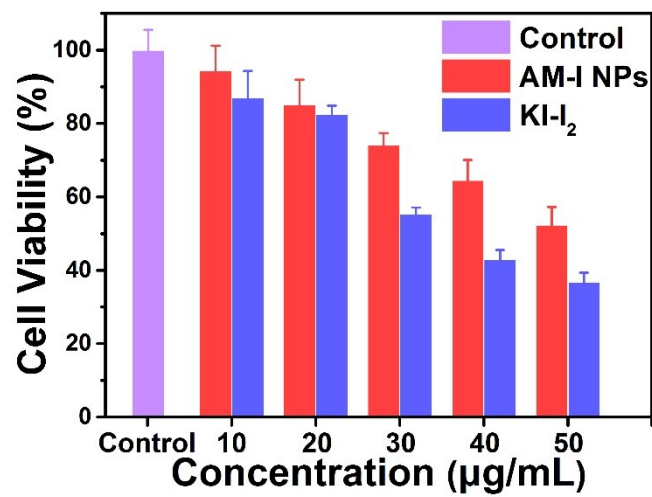

Fig. S7 Cell biocompatibility of AM-I NPs and KI-I<sub>2</sub> in gradient concentration for 24 h.
